# Supplementary material for: Reliability, validity, and sensitivity of the Japanese version of the University of California Los Angeles scleroderma clinical trial consortium gastrointestinal tract instrument: Application to efficacy assessment of intravenous immunoglobulin administration
Source: PubMed Central journal article supplement (PMC11483899; doi:10.1111/1346-8138.17202), 2024-04-01
Supplement: JDE-51--s002.pdf [file JDE-51--s002.pdf]

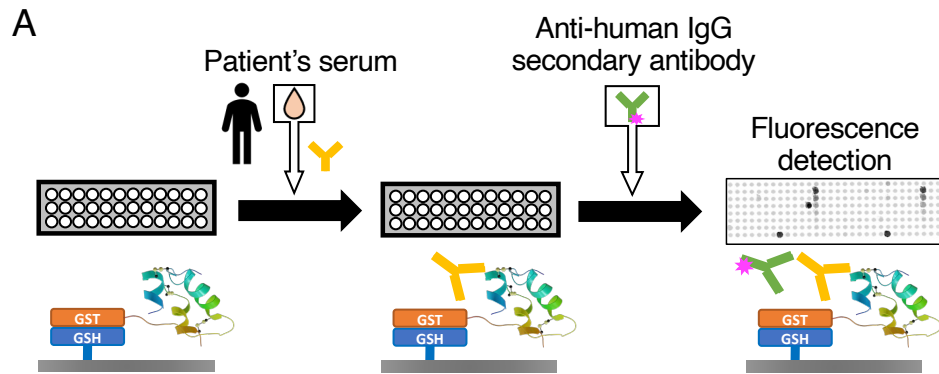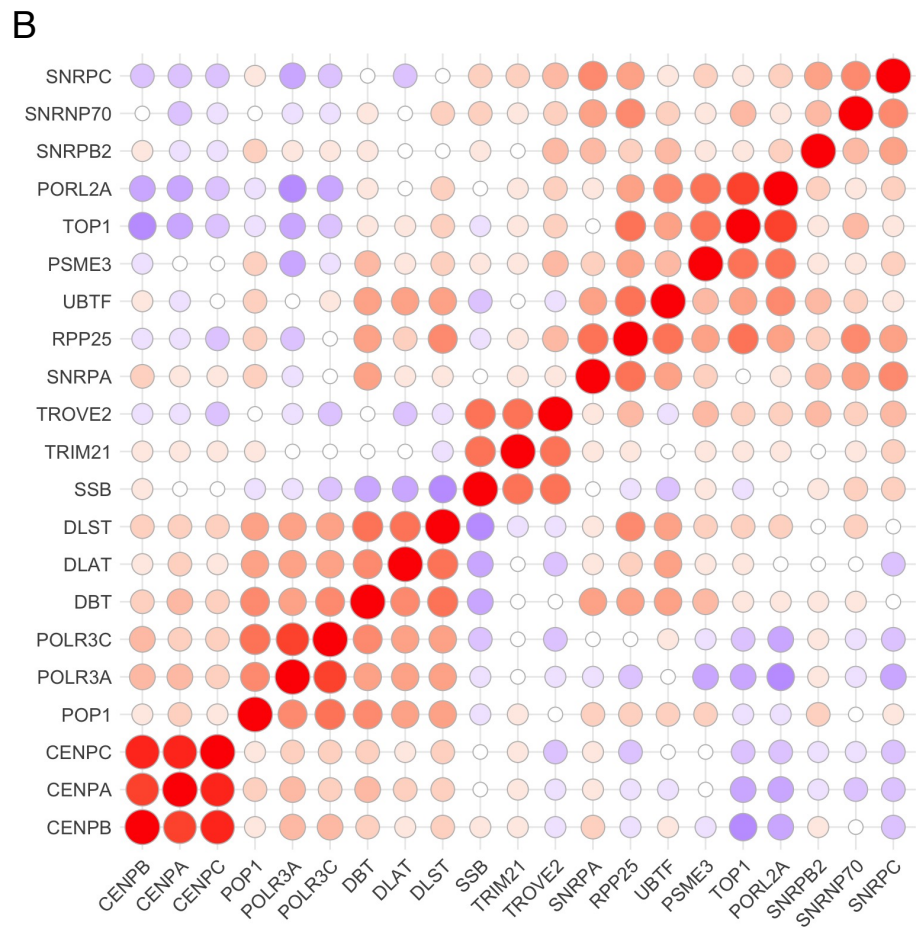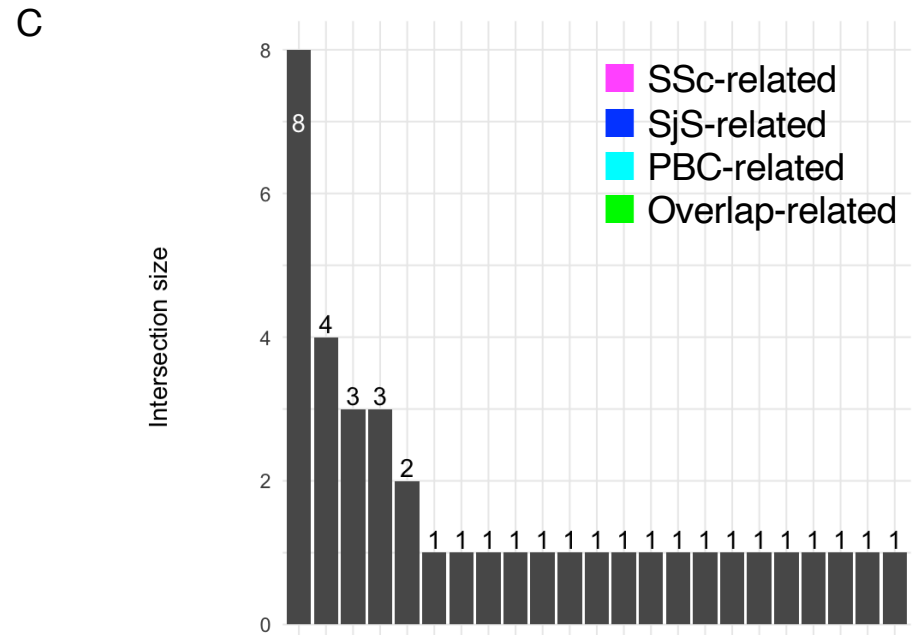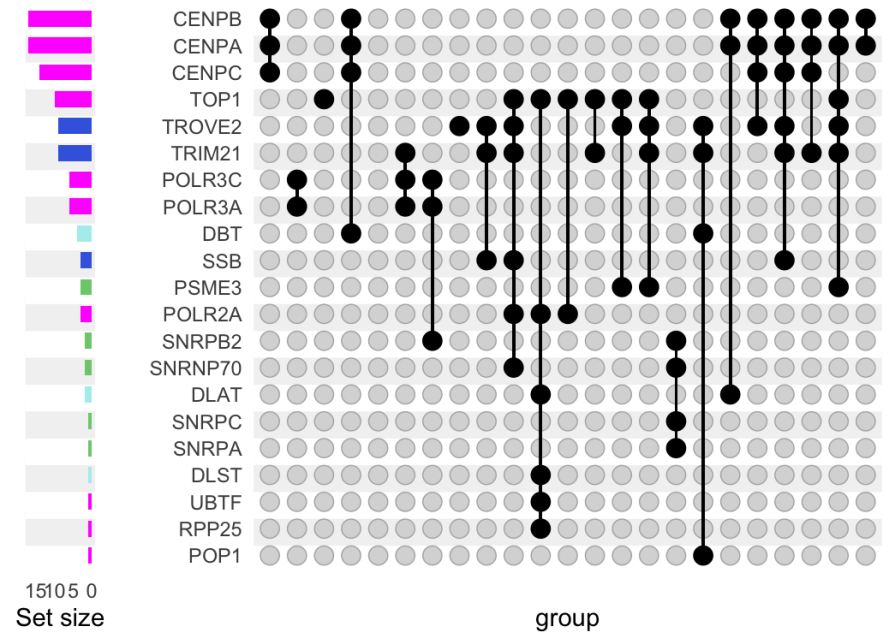

Matsuda KM et al.  
Supplementary Figure 1
