# Supplementary material for: Reliability, validity, and sensitivity of the Japanese version of the University of California Los Angeles scleroderma clinical trial consortium gastrointestinal tract instrument: Application to efficacy assessment of intravenous immunoglobulin administration
Source: PubMed Central journal article supplement (PMC11483899; doi:10.1111/1346-8138.17202), 2024-04-01
Supplement: JDE-51--s005.pdf [file JDE-51--s005.pdf]

## UCLA SCTC GIT 2.0 Questionnaire

The following questions ask about your digestive (gastrointestinal) symptoms over the past 7 days and how much they have affected your life. For all questions, please choose your answers from the options as indicated. If you are not sure how to answer a question, please select the closest possible answer.

**In the past week, please indicate the frequency (number of days) that the following occurred.**

|                                                                                          | None                 | 1-2 days             | 3-4 days             | 5-7 days             |
|------------------------------------------------------------------------------------------|----------------------|----------------------|----------------------|----------------------|
| Had difficulty swallowing solid foods.                                                   | <input type="text"/> | <input type="text"/> | <input type="text"/> | <input type="text"/> |
| Unpleasant sharp pain or burning sensation in the chest (heartburn)                      | <input type="text"/> | <input type="text"/> | <input type="text"/> | <input type="text"/> |
| Felt bitter or sour liquid coming up from the stomach to the mouth (gastric acid reflux) | <input type="text"/> | <input type="text"/> | <input type="text"/> | <input type="text"/> |
| Heartburn when eating "sour" foods like tomatoes and oranges                             | <input type="text"/> | <input type="text"/> | <input type="text"/> | <input type="text"/> |
| Vomited back up (vomited a small amount of food eaten or came up)                        | <input type="text"/> | <input type="text"/> | <input type="text"/> | <input type="text"/> |
| Slept with upper body elevated or back upright.                                          | <input type="text"/> | <input type="text"/> | <input type="text"/> | <input type="text"/> |
| Had nausea/feeling sick                                                                  | <input type="text"/> | <input type="text"/> | <input type="text"/> | <input type="text"/> |
| I vomited.                                                                               | <input type="text"/> | <input type="text"/> | <input type="text"/> | <input type="text"/> |

**In the past week, please indicate the frequency (number of days) that the following occurred.**

|                                                                                                             | None                     | 1-2 days                 | 3-4 days                 | 5-7 days                 |
|-------------------------------------------------------------------------------------------------------------|--------------------------|--------------------------|--------------------------|--------------------------|
| I had a feeling of fullness (gas or air in my stomach)                                                      | <input type="checkbox"/> | <input type="checkbox"/> | <input type="checkbox"/> | <input type="checkbox"/> |
| Sometimes the belly would bulge and sometimes it was necessary to loosen belts or unbutton pants and shirts | <input type="checkbox"/> | <input type="checkbox"/> | <input type="checkbox"/> | <input type="checkbox"/> |
| A little food filled me up.                                                                                 | <input type="checkbox"/> | <input type="checkbox"/> | <input type="checkbox"/> | <input type="checkbox"/> |
| Lots of farting and gas.                                                                                    | <input type="checkbox"/> | <input type="checkbox"/> | <input type="checkbox"/> | <input type="checkbox"/> |
| I didn't make it to the bathroom in time and soiled my underwear with stool.                                | <input type="checkbox"/> | <input type="checkbox"/> | <input type="checkbox"/> | <input type="checkbox"/> |
| Loose stools.                                                                                               | <input type="checkbox"/> | <input type="checkbox"/> | <input type="checkbox"/> | <input type="checkbox"/> |

**Over the past week, have you noticed that your stools have become**

|                     | No                       | Yes                      |
|---------------------|--------------------------|--------------------------|
| Stools were watery. | <input type="checkbox"/> | <input type="checkbox"/> |

**In the past week, please indicate how often your social life was interrupted by the following (e.g., visiting friends or relatives).**

|                                                         | None                     | 1-2 days                 | 3-4 days                 | 5-7 days                 |
|---------------------------------------------------------|--------------------------|--------------------------|--------------------------|--------------------------|
| nausea                                                  | <input type="checkbox"/> | <input type="checkbox"/> | <input type="checkbox"/> | <input type="checkbox"/> |
| vomiting                                                | <input type="checkbox"/> | <input type="checkbox"/> | <input type="checkbox"/> | <input type="checkbox"/> |
| gastralgia                                              | <input type="checkbox"/> | <input type="checkbox"/> | <input type="checkbox"/> | <input type="checkbox"/> |
| diarrhea                                                | <input type="checkbox"/> | <input type="checkbox"/> | <input type="checkbox"/> | <input type="checkbox"/> |
| Worries that you might accidentally soil your underwear | <input type="checkbox"/> | <input type="checkbox"/> | <input type="checkbox"/> | <input type="checkbox"/> |
| sensation of fullness                                   | <input type="checkbox"/> | <input type="checkbox"/> | <input type="checkbox"/> | <input type="checkbox"/> |

**In the past week, please indicate the frequency (number of days) that the following occurred.**

|                                                                                              | None                     | 1-2 days                 | 3-4 days                 | 5-7 days                 |
|----------------------------------------------------------------------------------------------|--------------------------|--------------------------|--------------------------|--------------------------|
| Felt concerned or anxious about gut issues                                                   | <input type="checkbox"/> | <input type="checkbox"/> | <input type="checkbox"/> | <input type="checkbox"/> |
| Embarrassment due to bowel symptoms.                                                         | <input type="checkbox"/> | <input type="checkbox"/> | <input type="checkbox"/> | <input type="checkbox"/> |
| Intestinal symptoms caused sexual problems and problems in the relationship with the partner | <input type="checkbox"/> | <input type="checkbox"/> | <input type="checkbox"/> | <input type="checkbox"/> |
| I was afraid I might not be able to find a restroom.                                         | <input type="checkbox"/> | <input type="checkbox"/> | <input type="checkbox"/> | <input type="checkbox"/> |
| Mental depression or weakness due to intestinal symptoms                                     | <input type="checkbox"/> | <input type="checkbox"/> | <input type="checkbox"/> | <input type="checkbox"/> |
| Avoided or postponed travel due to intestinal symptoms                                       | <input type="checkbox"/> | <input type="checkbox"/> | <input type="checkbox"/> | <input type="checkbox"/> |
| Anger and irritability due to intestinal symptoms.                                           | <input type="checkbox"/> | <input type="checkbox"/> | <input type="checkbox"/> | <input type="checkbox"/> |
| Sleep interrupted due to intestinal symptoms.                                                | <input type="checkbox"/> | <input type="checkbox"/> | <input type="checkbox"/> | <input type="checkbox"/> |
| Felt bowel symptoms worsened due to "stress" or emotional disturbances                       | <input type="checkbox"/> | <input type="checkbox"/> | <input type="checkbox"/> | <input type="checkbox"/> |

**Over the past week, have you noticed that your stools have become**

|                    | No                       | Yes                      |
|--------------------|--------------------------|--------------------------|
| It's getting hard. | <input type="checkbox"/> | <input type="checkbox"/> |

**In the past week, please indicate how often the following occurred**

|                                     | None                     | 1-2 days                 | 3-4 days                 | 5-7 days                 |
|-------------------------------------|--------------------------|--------------------------|--------------------------|--------------------------|
| Constipation or failure to defecate | <input type="checkbox"/> | <input type="checkbox"/> | <input type="checkbox"/> | <input type="checkbox"/> |
| Stools were hard.                   | <input type="checkbox"/> | <input type="checkbox"/> | <input type="checkbox"/> | <input type="checkbox"/> |
| Pain during defecation.             | <input type="checkbox"/> | <input type="checkbox"/> | <input type="checkbox"/> | <input type="checkbox"/> |
